# Supplementary material for: Probing the Structure of D2O Ice Layers on ALD-grown ZrO2, Al2O3 and TiO2 Thin Films by Sum Frequency Generation (SFG) Spectroscopy
Source: Royal Society of Chemistry journal article supplement (doi:10.1039/d5fd00152h), 2025-12-16
Supplement: d5fd00152h1.pdf [file d5fd00152h1.pdf]

## Supplementary Information

### Probing the Structure of D<sub>2</sub>O Ice Layers on ALD-Grown ZrO<sub>2</sub>, Al<sub>2</sub>O<sub>3</sub> and TiO<sub>2</sub> Thin Films by Sum Frequency Generation (SFG) Spectroscopy

Xia Li<sup>1\*</sup>, Susanne Gross<sup>1</sup>, Thomas Haunold<sup>1</sup>, Moon-Hyung Jang<sup>2</sup>, Marketa Zukalova<sup>3</sup>, Martin Jindra<sup>3</sup>,  
Joanna E. Olszówka<sup>4</sup>, Yu Lei<sup>2</sup>, Štefan Vajda<sup>4</sup>, and Günther Rupprechter<sup>1\*</sup>

1. Institute of Materials Chemistry, TU Wien, Vienna 1060, Austria.
2. Department of Chemical and Materials Engineering, University of Alabama in Huntsville, Huntsville, AL, 35899, USA.
3. Department of Electrochemical Materials, J. Heyrovsky Institute of Physical Chemistry, Dolejškova 2155/3, 182 00 Prague 8, Czech Republic.
4. Department of Nanocatalysis, J. Heyrovsky Institute of Physical Chemistry, Prague, Czech Republic.

**XPS of ALD films:** During XPS fitting, the spin-orbit coupling was neglected for Si 2p and Al 2p due to the low doublet separation energies of only 0.6<sup>1</sup> and 0.4 eV<sup>2</sup>, respectively, as these are below the spectral resolution of the analyzer (approximately 0.6-0.9 eV, depending on the full width at half maximum, FWHM, and signal-to-noise ratio). For peak fitting of Ti 2p and Zr 3d regions, doublet separation energies of 5.7 and 2.4 eV were constraint, according to the NIST XPS database. In case of Zr 3d, a peak area ratio of 3d<sub>5/2</sub>:3d<sub>3/2</sub> = 3:2 was employed, whereas the Ti 2p peak area ratio was left unconstraint due to Coster-Kronig broadening of Ti 2p<sub>1/2</sub>.

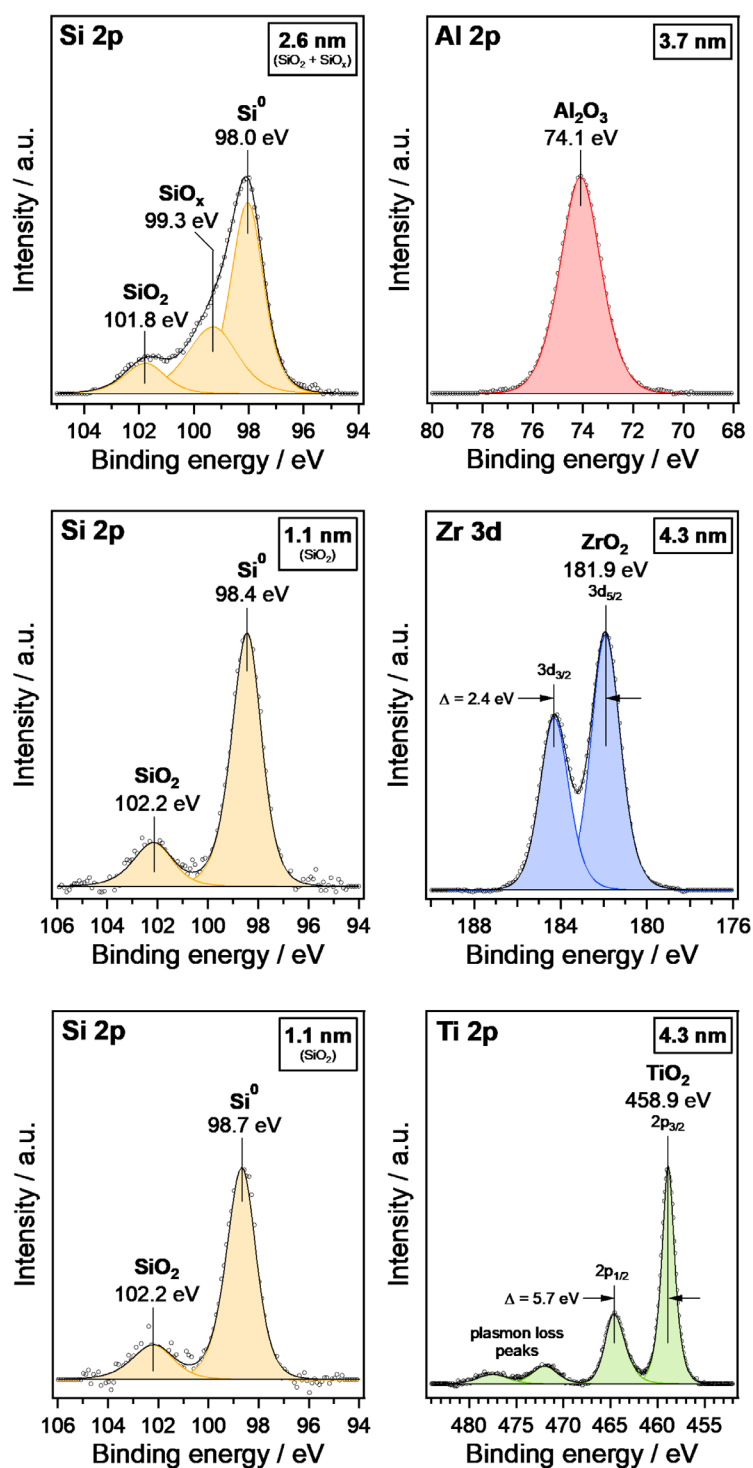

**Figure S1** XPS spectra of ALD-grown  $\text{Al}_2\text{O}_3$ ,  $\text{ZrO}_2$ , and  $\text{TiO}_2$  films deposited on a Si wafer after pretreatment with oxidation ( $1 \times 10^{-6}$  mbar  $\text{O}_2$ , 923 K, 30 min) and reduction ( $1 \times 10^{-6}$  mbar  $\text{H}_2$ , 923 K, 30 min).

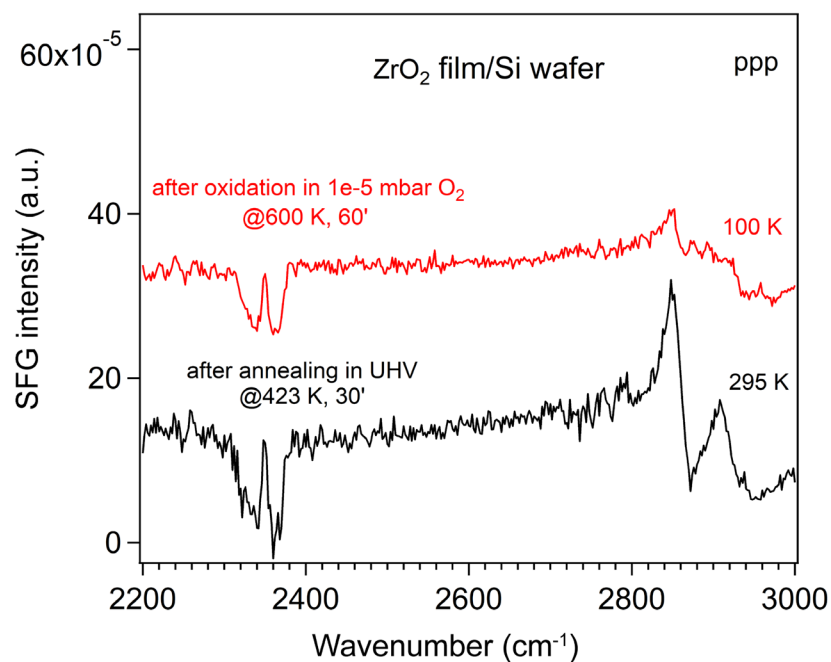

**Figure S2** Comparison of ppp-SFG spectra of ZrO<sub>2</sub> film/Si with annealing at 423 K in UHV and at 600 K in 1x10<sup>-5</sup> mbar O<sub>2</sub>.

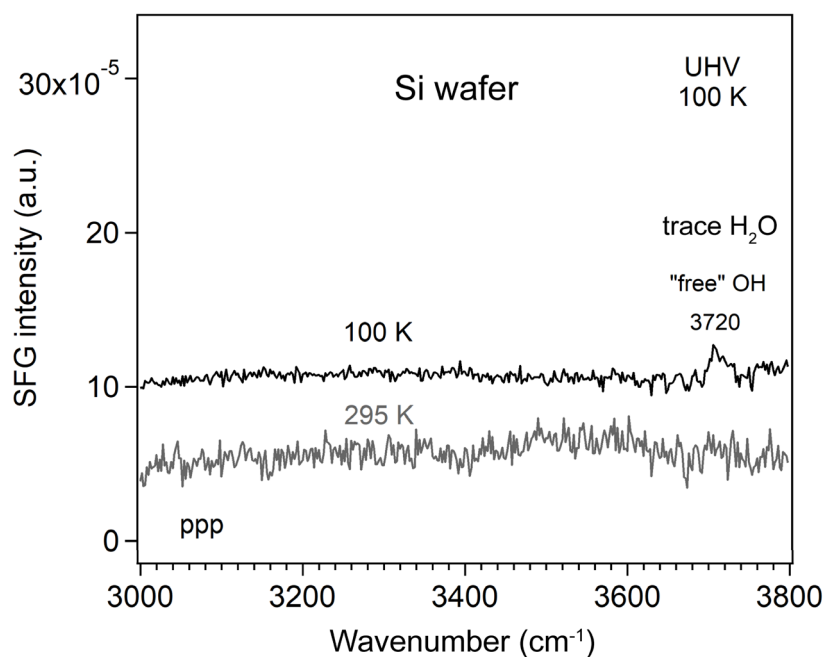

**Figure S3** ppp-SFG spectra of blank Si at 100 and 295 K under UHV in the range of 3000-3800 cm<sup>-1</sup>.

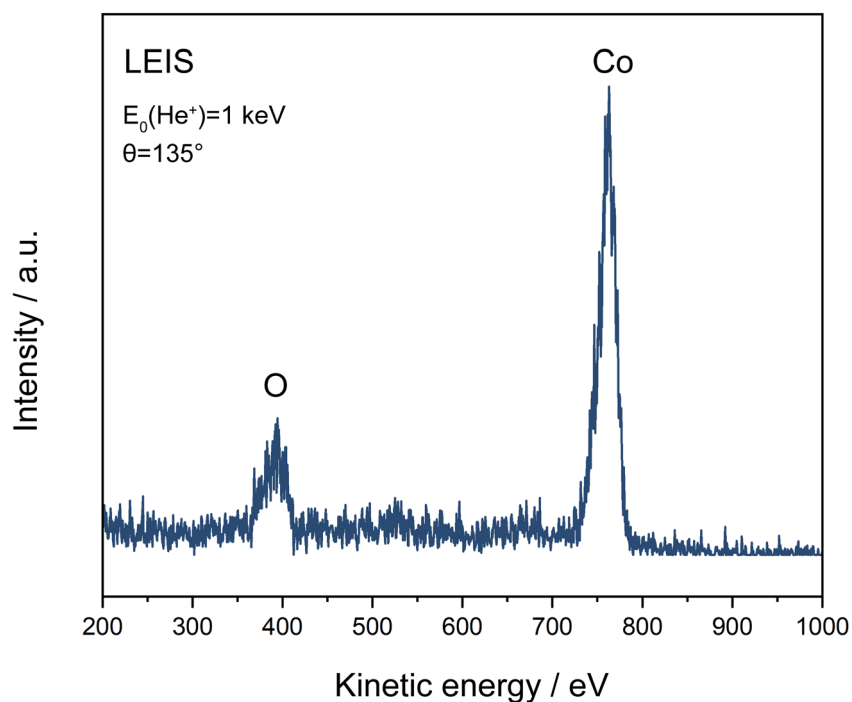

**Figure S4** LEIS spectrum of the oxidized polycrystalline Co foil.

XPS Spectra of the oxidized Co foil were calibrated to the O 1s binding energy of 529.79 eV, following the reference values reported by Biesinger et al.<sup>3</sup> for CoO, due to the absence of adventitious carbon and the lack of a measurable Co Fermi edge caused by the oxide layer thickness. Quantification was performed using the Co 2p and O 1s regions after applying a Shirley-type and linear background subtraction, respectively.

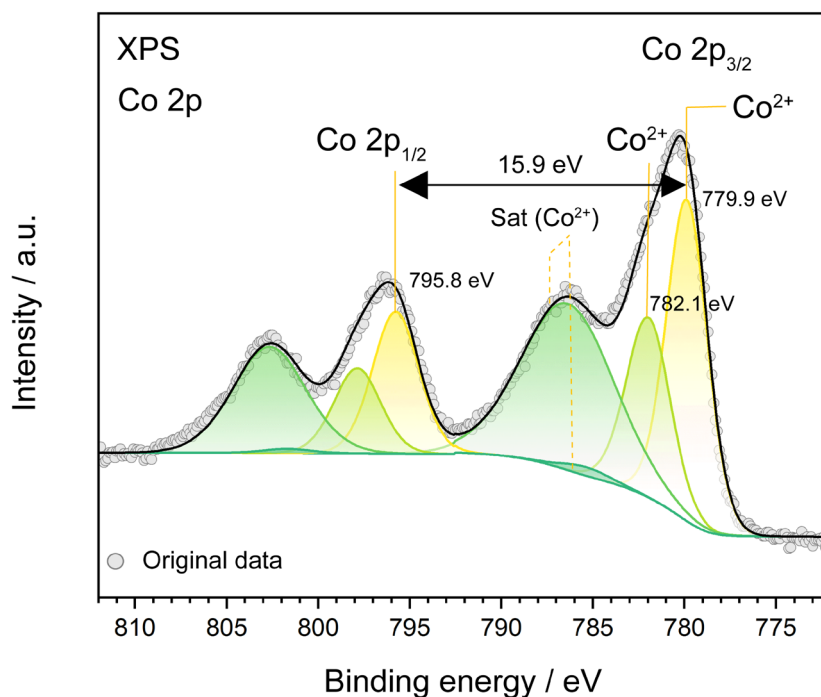

**Figure S5** Co 2p-XPS spectrum of the oxidized polycrystalline Co foil.

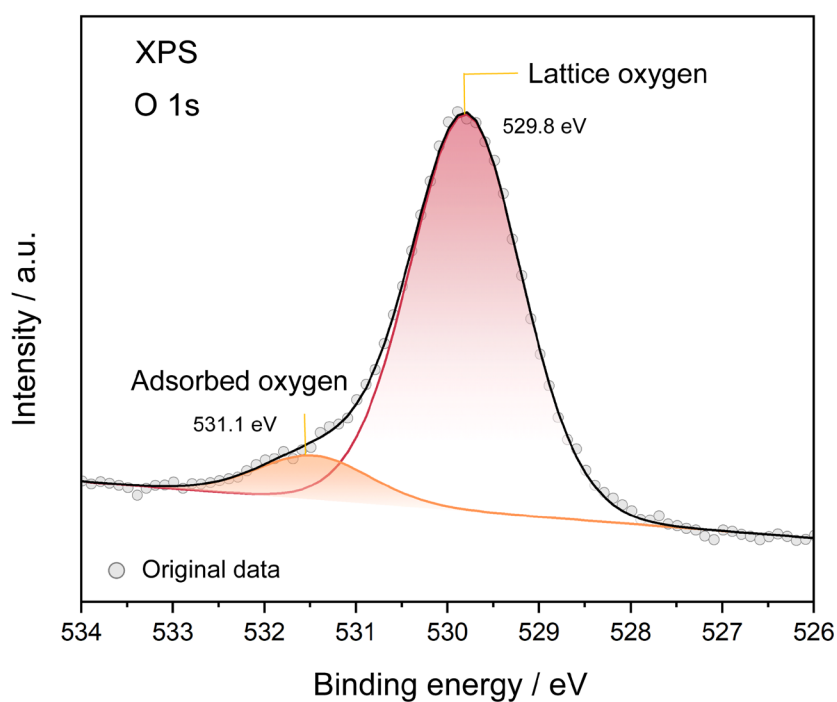

**Figure S6** Co 1s-XPS spectrum of the oxidized polycrystalline Co foil.

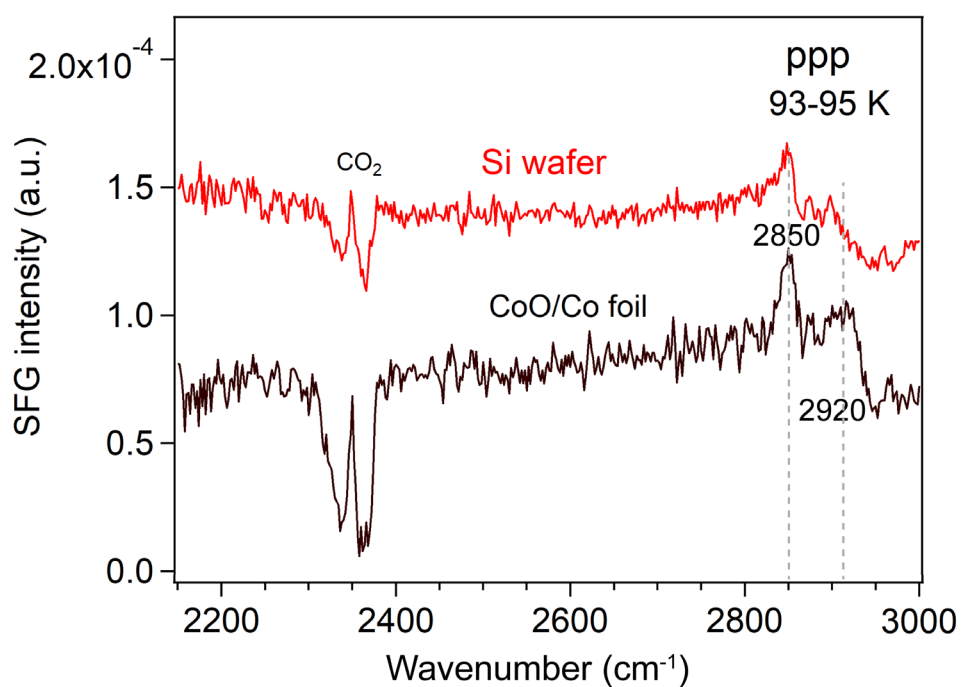

**Figure S7** Comparison of ppp spectra of pure CoO film-Co foil and Si water in the range of 2150-2800 cm<sup>-1</sup> acquired at 93-95 K.

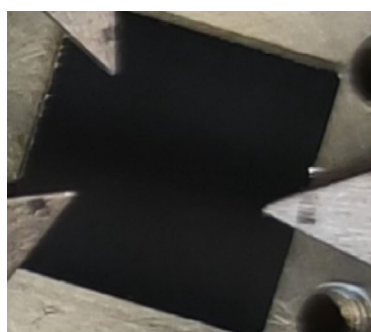

(a)  $\text{ZrO}_2$  film/Si wafer

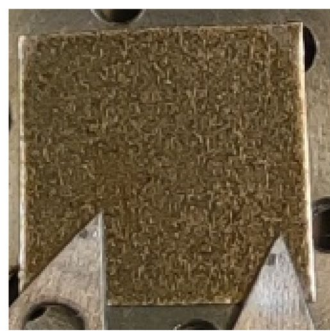

(b) CoO film/unpolished Co foil

**Figure S8** Photographs of (a) a  $\text{ZrO}_2$  film on a flat Si wafer prepared by atomic layer deposition and (b) a CoO film on an unpolished, rough Co foil obtained by oxidation in  $1 \times 10^{-5}$  mbar  $\text{O}_2$  at 600 K for 1 h.

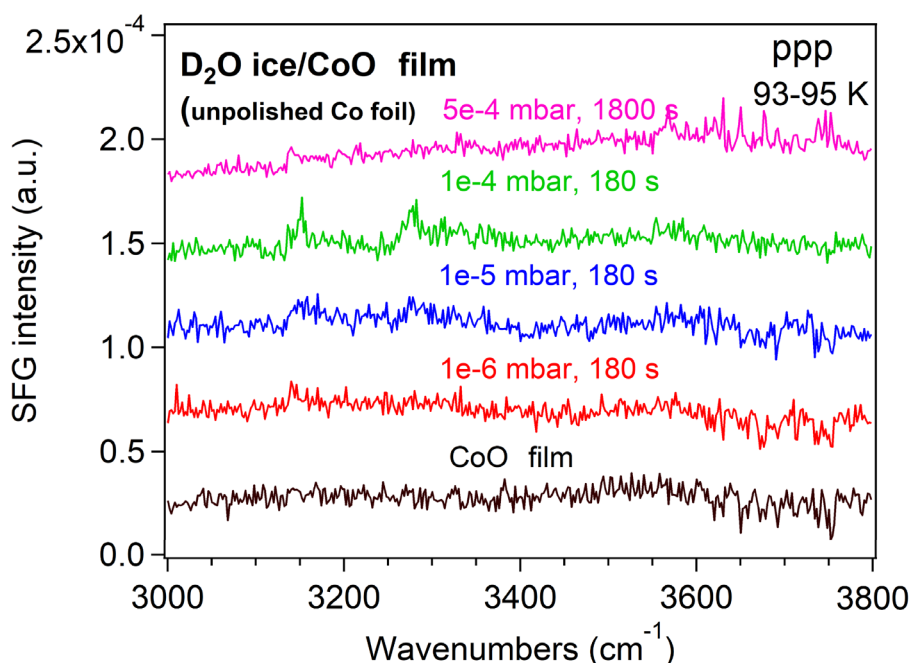

**Figure S9** ppp-SFG spectra of  $\text{D}_2\text{O}$  adsorption on CoO/Co foil (unpolished) at 93-95 K in the range of 3000-3800  $\text{cm}^{-1}$ .

## References

- [1] Y. Cao; L. Nyborg; U. Jelvestam. *Surf. Interface Anal.* 2009, **41**, 471–483. <https://doi.org/10.1002/sia.3050>.
- [2] W. D., and S. Yip. *Materials interfaces: Atomic-level structure and properties*; Chapman and Hall, 1992.
- [3] M. C. Biesinger; B. P. Payne; A. P. Grosvenor; L. W. M. Lau; A. R. Gerson; R. S. C. Smart. *Appl. Surf. Sci.* 2011, **257**, 2717–2730. <https://doi.org/10.1016/j.apsusc.2010.10.051>.
